# Supplementary material for: Universal structural mechanism underlying collective order in active matter
Source: Research Square preprint supplement (doi:10.21203/rs.3.rs-8051267/v1), 2025-12-02
Supplement: Supplementary file 1 [file 4fdfc467639db33de930ec4d.docx]

**Supplementary Information**

**“Universal structural mechanism underlying collective order in active matter”**

Ruizhi Jin and Kejun Dong

# Derivation of at a given noise strength

In the considered Vicsek system at the maximum order state, particles are nearly all moving along the average direction . To simplify the calculation, we rotate the coordinate frame so that the average direction aligns with x-axis. Note this will not affect the results. As at a time step, each particle’s moving direction will be affected by a noise uniformly distributed between , the particles direction distribution is also uniformly distributed in this range.

The global order parameter is given by:

(S1)

Since is uniformly distributed in , we get:

(S2)

(S3)

Substituting Eqs. (S2) and (S3) into Eq. (S1), and consider this is the maximum order state:

(S4)

Table S1 shows that the maximum order parameter obtained from simulations closely approaches the theoretical upper limit and does not exceed it even at high densities.

Table S1. The comparison between theoretical prediction and numerical simulation

| η | 0.2 | 0.5 | 0.75 | 1 |
| --- | --- | --- | --- | --- |
| *Φmax*  (prediction) | 0.9983 | 0.9896 | 0.9767 | 0.9588 |
| *Φmax*  (simulation) | 0.9979 | 0.9887 | 0.9747 | 0.9552 |

# Curvature method to detect the critical points in / curve

As given in the main text, the relationship between and is expressed by a sigmoid function:

(S5)

The curvature of the function is given by:

(S6)

where is the first derivative of , given by:

(S7)

and is the second derivative of , given by:

(S8)

The curvature as a function of is shown in FIG. S1a. It exhibits both a maximum and a minimum, which correspond to two distinct points of critical change in the *Φ∼⟨K⟩* relationship. Figure S1b shows that the first derivative is smaller than 0.08. Therefore, the curvature factor is close to 1, and the curvature function closely approximates the second derivative at those points. The two extreme points can be determined by solving the condition , where is given by:

(S9)

where .

The two critical points can then be expressed by:

(S10)

The first critical point, denoted as 〈*K*〉*c*, corresponds to the disorder-order phase transition. The second critical point, defined as the onset saturation point and denoted as 〈*K*〉*os*, marks the stage where *Φ* transits from rapid growth to slow growth. Furthermore, the saturation point 〈*K*〉*s* is defined at the point where , beyond which *Φ* remainsessentially constant despite further increases in 〈*K*〉.


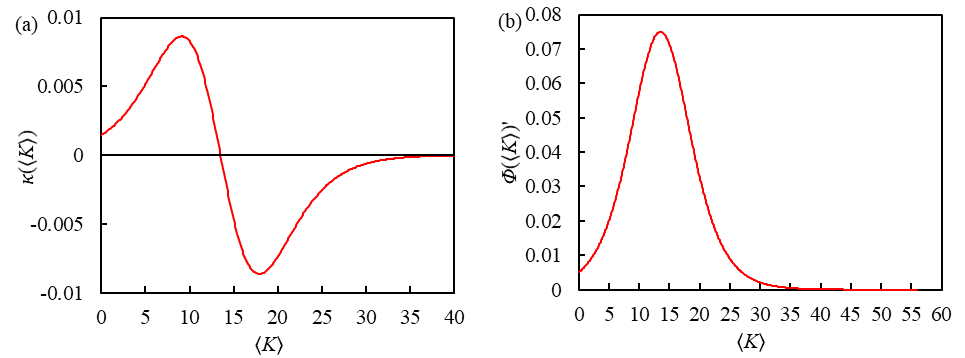


FIG. S1 (a) Curvature function as a function of 〈*K*〉. (b) First derivative function as a function of 〈*K*〉.

# *ρ*0.5/*η* vs *Φ* and 〈*K*〉

Previously, a general relationship between the composite controlling variable *ρ*0.5/*η* and the order parameter *Φ* was proposed in [31]. Figure S2a shows this relationship also holds in our simulations. In addition, we find a universal correlation between *ρ*0.5/*η* and the structural parameter 〈*K*〉, which provides the structure origin for the previous relationship. However, the 〈*K*〉~*ρ*0.5/*η* relationship starts to diverge when *ρ*0.5/*η*>1, as 〈*K*〉 is increasingly insensitive to noise at the high-density condition, as shown in FIG. 1b.


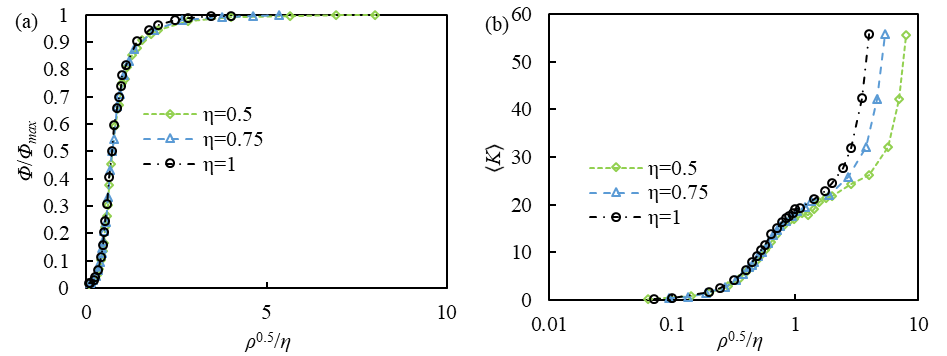


FIG. S2 (a) The normalized order parameter *Φ/Φmax* and (b) the average interaction number 〈*K*〉 as a function of *ρ*0.5/*η*.

# Calculate the degree distribution of starling flocks based on nearest neighbor distance

In Refs [2] and [36], 500 independent flocking events were collected, and the coordinates of each bird in each flock at every time frame were measured. However, the interaction range *Rc* is unknown. To use a metric-based rule to determine alignment neighbors, it is essential to define the interaction range *Rc*. We adopt a nearest-neighbor-distance (NND) approach to derive *Rc* for the dataset from Ref [36] (event 28-10). Specifically, we calculate the median value of NND as shown in FIG. S3, and define the interaction range as twice the median value, given by:

(S11)

Figure S3 also shows that the derived value *Rc* ensures that almost every bird maintains at least one neighbor within the interaction range, resulting in a flock with negligible isolated members. The average interaction number 〈*K*〉 based on this method is 6.5, which is close to the empirically observed topological number [2], further supporting our assumption.

FIG. S3 Cumulative function distribution (CDF) of the nearest neighbor distance (NND) in the starling flock.

# Closed form of order parameter vs cluster size distribution

In the main text, we show that in Stages I (Disorder) and II (Order growth), the order parameter *Φ* can be calculated by cluster size distribution *P*(*Scl*) and the uniform correlation between the alignment of cluster and the cluster size (Eq. (5)). If we use some approximation, we can get the closed form of *Φ* vs *P*(*Scl*).

In Stage I (Disorder), the cluster size distribution follows an exponential distribution. If we assume , approximate Eq. (5) as , and change Eq. (6) into integral form, we can get a closed-form for the relationship between *Φ* and *γ*, given as:

(S12)

From Eq. (S12), a decrease in *γ* leads to an increase in *Φ*, which is consistent with our results. Moreover, since *γ* is much larger than 0.0025, as shown in FIG. S4, *Φ* remains at a low level, corresponding to consistent low *Φ* in this stage.

In Stage II (Order growth), *P*(*Scl*) turns into a power-law distribution: with ranging around 2 [24]. If we set *α*=2, the integral form of Eq. (6) from the main article can be expressed as:

(S13)

where is the exponential integral and denotes the upper limit of the integral for . For example, at the disorder-order transition point, is around 1000. Substituting this into Eq. (S13), the value of *Φ* is 0.219, which is close to our numerical simulation results. It can be evident that *Φ* strongly depends on . In Stage II, develops a heavier tail and increases, which gives large clusters greater weight and drives a rapid rise in *Φ*.


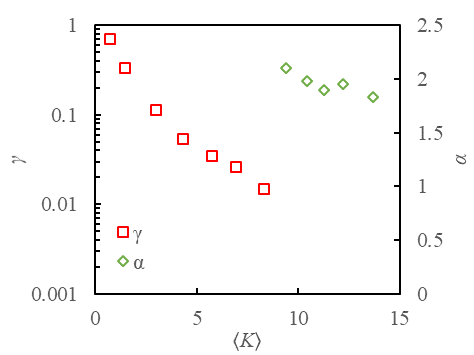


FIG. S4 Exponential coefficient *γ* (Stage I) and Power-law coefficient *α* (Stage II) as a function of 〈*K*〉.

# Derivation of *Φ* as a function of 〈*K*〉 in Stage III (Order coherence)

In the considered Vicsek system, if the average velocity direction is , the deviation of particle *i* is :

(S14)

When the system is very ordered, , we can expand in a Taylor series with the higher-order items omitted, which yields:

(S15)

In the Vicsek model, the direction of particle *i* is updated according to:

(S16)

When the system is very ordered,, , and are all close to , then the deviation satisfies:

(S17)

In the central limit theorem, if there are a large number of independent and identically distributed random variables X1, X2, …, Xn, their average

(S18)

tends to follow a normal distribution:

(S19)

At first, and all can be treated as random variables with a mean and variance . The angular noise is uniformly distributed between , hence:

(S20)

Therefore, the variance of at fixed *K* is:

(S21)

However, the real relationship may be more complicated as each neighbor *j* has its own degree *Kj* due to degree heterogeneity:

(S22)

where . It can be seen that *AK* decreases as 〈*K*〉 increases, because size-biased neighbors are, on average, of high degree, which leads to a stronger local averaging effect. Substituting Eq. (S22) into Eq. (S15), we obtain:

(S23)

where the parameters *a* and *b* are related to the interaction structure and the noise limit, respectively.

# Finite-size effect on *Φ*~〈*K*〉 relationship

To examine the effect of system size, we perform two additional sets of simulations with different particle numbers (*N*=512 and 32768). As shown in FIG. S5, the *Φ*~〈*K*〉 relationships for different *N* show similar shapes but shift rightward with increasing *N*. Since the sigmoid function describing the *Φ*~〈*K*〉 relationships has two controlling parameters, i.e., in the general form , *a* controls the shape and *b* controls the position, we focus on scaling *b*. Inspired by the finite-size scaling factor *L*0.275 proposed in a previous study [31] and noting that *N~L*2 in 2D, we propose a similar factor *N* as *N*0.275/2. Incorporating this scaling into *b*, Eq. (1) for *Φ*~〈*K*〉 relationship is modified as

(S24)

As shown in FIG. S5, the predicted curves based on Eq. (S24) agree well with the simulation data for N=512 and 32768, which tentatively shows the universality across system sizes. Future work will study the detailed curve shape and perform a cluster-level analysis for different particle numbers.


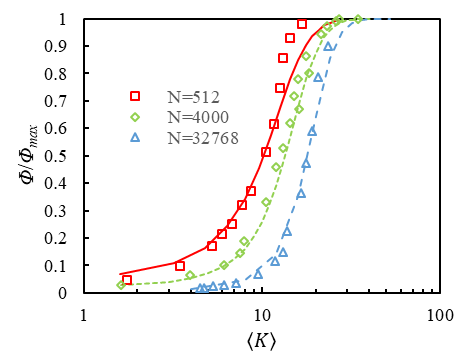


FIG. S5 The normalized order parameter *Φ/Φmax* as a function of the average interaction number 〈*K*〉 for three different particle numbers (*N*=512, 4000 and 32768). Symbols are simulation results and lines are predicted by Eq. (S24) for different *N*.
